# Supplementary material for: Use of Wild Edible Plants: Can They Meet the Dietary and Nutritional Needs of Indigenous Communities in Central India
Source: MDPI journal article supplement (doi:10.3390/foods10071453), 2021-06-23
Supplement: s1 [file s1]

**Table S1:** Diversified plant species found in Achanakmaar Amarkantak Biosphere Reserve (AABR) of Central India

| Wild leafy edibles used by indigenous communities |                                          |                |                      |       |                                   |                  |                     |                      |              |                                 |
|---------------------------------------------------|------------------------------------------|----------------|----------------------|-------|-----------------------------------|------------------|---------------------|----------------------|--------------|---------------------------------|
| S. No.                                            | Botanical name                           | Family         | Local name           | Habit | Habitat                           | Part used        | Mode of utilization | Season of collection | Edible value | Diversity of uses               |
| 1                                                 | <i>Achyranthes aspera</i> Linn.          | Amaranthaceae  | Chirchitta, Latjeera | H     | Wasteland & Forest fringes        | Tender Leaves    | Cooked as vegetable | R                    | ++           | Medicinal and religious         |
| 2                                                 | <i>Alternanthera philoxeroides</i> Mart. | Amaranthaceae  | Katuashak            | H     | Forest                            | Twigs and leaves | Cooked as vegetable | S                    | ++           | -                               |
| 3                                                 | <i>Alternanthera sessilis</i> Mart.      | Amaranthaceae  | Garundi              | H     | Forests and wastelands lands      | Twigs            | Cooked as vegetable | S                    | ++           | Medicinal                       |
| 4                                                 | <i>Amaranthus caudatus</i> Linn.         | Amaranthaceae  | Rajgirbhaji          | H     | Village commons                   | Seeds & Leaves   | Cooked as vegetable | R                    | ++++         | -                               |
| 5                                                 | <i>Amaranthus hybridus</i> Linn.         | Amaranthaceae  | Lalbhaji             | H     | Village commons                   | Leaves           | Cooked as vegetable | W & S                | ++++         | Medicinal                       |
| 6                                                 | <i>Amaranthus spinosus</i> Linn.         | Amaranthaceae  | Kanta Cholai, Barre  | H     | Wastelands and fringes of forests | Leaves           | Cooked as vegetable | R                    | +++          | Medicinal                       |
| 7                                                 | <i>Amaranthus viridis</i> Linn.          | Amaranthaceae  | Jungli chaulai       | H     | Wastelands and fringes of forests | Leaves           | Cooked as Vegetable | R                    | ++++         | -                               |
| 8                                                 | <i>Antidesma diandrum</i> Roxb.          | Euphorbiaceae  | Saroti               | S     | Forests                           | Leaves & fruits  | Cooked as vegetable | S                    | +++          | Medicinal & Firewood            |
| 9                                                 | <i>Argyreia strigosa</i> (Roth) Sant.    | Convolvulaceae | Baghhooda            | H     | Wastelands and                    | Young leaves     | Cooked as vegetable | R                    | ++           | Medicinal                       |
| 10                                                | <i>Bambusa bambos</i> Linn.              | Poaceae        | Bans Kareel          | S     | Forests & Agricultural lands      | Shoots           | Vegetable, pickle   | R                    | ++++         | Fodder, household articles etc. |
| 11                                                | <i>Bambusa vulgaris</i> Schrad.          | Poaceae        | Bans Kareel          | S     | Forests & Agricultural lands      | Shoots           | Vegetable, pickle   | R                    | ++++         | Fodder, household articles etc. |

|    |                                            |               |                      |    |                               |                              |                                                     |       |      |                               |
|----|--------------------------------------------|---------------|----------------------|----|-------------------------------|------------------------------|-----------------------------------------------------|-------|------|-------------------------------|
| 12 | <i>Basella alba</i> Linn.                  | Basellaceae   | Ban Poi              | Cl | Degraded forests              | Leaves                       | Cooked as vegetable                                 | W     | +++  | Medicinal                     |
| 13 | <i>Bauhinia purpurea</i> Linn.             | Fabaceae      | Koelar-Kachnar       | T  | Forests                       | Tender leaves & Flower buds  | Cooked as vegetable                                 | S     | +++  | Firewood & fodder. Bark dyes. |
| 14 | <i>Boerhavia diffusa</i> Linn.             | Nyctigenaceae | Ghetuli              | H  | Forests                       | Leaves                       | Cooked as vegetable                                 | R     | ++   | Fodder & Medicinal            |
| 15 | <i>Careya arborea</i> Roxb.                | Myrtaceae     | Kumbhibaji           | T  | Degrade forests               | Leaves                       | Cooked as vegetable                                 | S     | +++  | Firewood, Medicinal           |
| 16 | <i>Cassia fistula</i> Linn.                | Fabaceae      | Amltas, dhanbaher    | T  | Forest fringes                | Flower buds and young leaves | Cooked with pulses                                  | S     | +++  | Firewood, & Medicinal         |
| 17 | <i>Cassia tora</i> Linn.                   | Fabaceae      | Charota              | H  | Grassland and degrade forests | Young leaves                 | Leaves cooked as vegetable and roasted seeds eaten. | R     | +++  | Medicinal                     |
| 18 | <i>Celosia argentea</i> Linn.              | Amaranthaceae | Phul Bhaji/Gadrya    | H  | Wastelands and agriculture    | Leaves                       | Cooked as vegetable                                 | R     | +++  | -                             |
| 19 | <i>Chenopodium album</i> Linn.             | Amaranthaceae | Batuabhaji           | H  | Agriculture wastelands        | Leaves young shoots          | Cooked as vegetable                                 | W     | ++++ | Medicinal                     |
| 20 | <i>Chlorophytum tuberosum</i> (Roxb.) Bak. | Asparagaceae  | Safed Musli          | H  | Forests                       | Young leaves, bulbs          | Cooked as vegetable                                 | R & W | ++   | Medicinal                     |
| 21 | <i>Cleome viscosa</i> Linn.                | Cleomaceae    | Hurhurria            | H  | Wastelands                    | Leaves                       | Cooked as Vegetable                                 | R & W | ++   | -                             |
| 24 | <i>Coccinia grandis</i> (Linn.) J. Voigt   | Cucurbitaceae | Bendarikh and/Tendli | Cl | Wastelands                    | Young leaves & fruit         | Cooked as Vegetable                                 | S & W | ++   | -                             |

|    |                                               |               |                       |   |                                  |                                  |                                                 |       |      |                                                                                                                    |
|----|-----------------------------------------------|---------------|-----------------------|---|----------------------------------|----------------------------------|-------------------------------------------------|-------|------|--------------------------------------------------------------------------------------------------------------------|
| 22 | <i>Colocasia esculenta</i> Linn.              | Araceae       | Jungle<br>Arbi/ghuia  | H | Swampy<br>areas                  | Leaves<br>&<br>corms             | Cooked as<br>vegetable                          | S & W | +++  | Medicinal                                                                                                          |
| 23 | <i>Commelina benghalensis</i><br>Linn.        | Commelinaceae | Kenna                 | H | Wastelands                       | Leaves<br>&<br>young<br>shoots   | Cooked as<br>vegetable                          | R     | ++   | Fodder &<br>Medicinal                                                                                              |
| 26 | <i>Corchorus<br/>acutangulus</i> Lam.         | Tiliaceae     | Masaria<br>Bhaji      | H | Wastelands                       | Leaves                           | Cooked as<br>vegetable                          | R     | +++  | -                                                                                                                  |
| 25 | <i>Corchorus trilocularis</i><br>Linn.        | Tiliaceae     | Chench                | H | Wastelands                       | Leaves                           | Cooked as<br>vegetable                          | R     | +++  | -                                                                                                                  |
| 27 | <i>Cordia myxa</i> Forst.                     | Boraginaceae  | Bohar                 | T | Forest                           | Tender<br>leaves<br>& twigs      | Cooked as<br>vegetable<br>and fruits<br>pickled | S     | +++  | Firewood &<br>Medicinal                                                                                            |
| 28 | <i>Dendrocalamus strictus</i><br>(Roxb.) Nees | Poaceae       | Lathi bans            | S | Forest &<br>Agriculture<br>lands | Young<br>shoots<br>and<br>leaves | Cooked as<br>vegetable<br>& pickles             | R     | ++++ | Fodder, Live<br>fencing, Fishing<br>rods, agril<br>implements<br>household<br>articles, Ladder,<br>sticks, baskets |
| 29 | <i>Digera muricata</i> (L.)<br>Mart           | Amaranthaceae | Chanchali             | H | Agriculture<br>lands             | Leaves                           | Cooked as<br>vegetable                          | R & W | +++  | Medicinal                                                                                                          |
| 30 | <i>Emilia sonchifolia</i> (L.)<br>DC.         | Asteraceae    | Hirankuri             | H | Wastelands                       | Leaves<br>&<br>young<br>shoots   | Cooked as<br>vegetable                          | R & W | ++   | Medicinal                                                                                                          |
| 31 | <i>Eryngium<br/>foetidum</i> Linn.            | Apiaceae      | Van<br>Dhania         | H | Wastelands<br>and forest         | Leaves                           | Spice                                           | R     | +++  | Medicinal                                                                                                          |
| 32 | <i>Ficus infectoria</i> Roxb.                 | Moraceae      | Pakri                 | T | Wastelands<br>and forest         | Leaves                           | Cooked as<br>vegetable                          | Y     | ++   | Fodder,<br>firewood,<br>Medicinal                                                                                  |
| 33 | <i>Hibiscus sabdariffa</i> L.                 | Malvaceae     | Amari baji            | H | Agriculture<br>and<br>homestaeds | Leaves                           | Cooked as<br>vegetable                          | W     | ++++ | -                                                                                                                  |
| 34 | <i>Hibiscus sp.</i>                           | Malvaceae     | Bhalobhaji-<br>Katta, | H | Agriculture<br>lands             | Leaves                           | Cooked as<br>vegetable                          | W     | +++  | -                                                                                                                  |

|    |                                                |                  |                      |    |                                 |                       |                                                          |       |      |                      |
|----|------------------------------------------------|------------------|----------------------|----|---------------------------------|-----------------------|----------------------------------------------------------|-------|------|----------------------|
|    |                                                |                  | Amarkatva , Patwa    |    |                                 |                       | & pickle                                                 |       |      |                      |
| 35 | <i>Ipomea aquatica</i> Forsk.                  | Convolvulaceae   | Karmatta             | Aq | Swampy areas                    | Leaves & twigs        | Cooked as vegetable                                      | S & W | ++++ | -                    |
| 36 | <i>Ipomea batatas</i> (Linn.) Lam.             | Convolvulaceae   | Kandabhaji Mitha Alu | H  | Swampy areas                    | Young leaves & tubers | Cooked as vegetable, Kheer, Halua, Chips & boiled tubers | W     | +++  | -                    |
| 37 | <i>Ipomea eriocarpa</i> R. Br.                 | Convolvulaceae   | Buta                 | H  | Swampy areas                    | Young leaves          | Cooked as vegetable                                      | W     | ++   | -                    |
| 38 | <i>Lagerstroemia parviflora</i> Roxb.          | Lythraceae       | Senna                | T  | Forest                          | Tender leaves         | vegetable                                                | S     | +    | Timber & Firewood    |
| 39 | <i>Lepidium sativum</i> Linn.                  | Brassicaceae     | Chandrasur           | H  | Forest and Agriculture lands    | Young leaves          | Cooked as vegetable                                      | W     | ++   | Medicinal            |
| 40 | <i>Leucas aspera</i> (Willd) Linn.             | Lamiaceae        | Ghooma               | H  | Forest                          | Young leaves          | Spice                                                    | R     | ++   | -                    |
| 41 | <i>Limnophila rugosa</i> (Roth.) Merr.         | Scrophulariaceae | Bintugo              | H  | Wastelands                      | Leaves                | Cooked as vegetable                                      | Y     | +    | Medicinal            |
| 42 | <i>Marsilea minuta</i> Linn.                   | Marsileaceae     | Sunsiniya            | Aq | Agriculture and waste lands     | Leaves                | Cooked as vegetable                                      | S & W | ++++ | Medicinal            |
| 43 | <i>Mentha arvensis</i>                         | Lamiaceae        | Pudina               | H  | Forest and Agril                | Leaves                | Spices & pickled                                         | Y     | ++++ | Medicinal            |
| 44 | <i>Merremia emarginata</i> (Burm. F) Hallier.F | Convolvulaceae   | Muskani Baji         | H  | Swampy areas                    | Leaves                | Cooked as vegetable                                      | R     | +++  | -                    |
| 46 | <i>Momordica charantia</i> Linn.               | Cucurbitaceae    | Karelabaji           | Cl | Waste and Agriculture lands     | Leaves & fruits       | Cooked as vegetable                                      | Y     | +++  | Medicinal            |
| 45 | <i>Moringa oleifera</i> Lam.                   | Moringaceae      | Munga, sahejan       | T  | Agriculture and village commons | Young leaves & pods   | Cooked as vegetable                                      | S & W | +++  | Firewood & Medicinal |
| 47 | <i>Murraya koenigii</i> (Linn.) Sprengal       | Rutaceae         | Mitineem             | T  | Wastelands                      | Leaves                | Spice additive                                           | Y     | +++  | Medicinal            |
| 48 | <i>Nelumbo nucifera</i>                        | Nelumbonaceae    | Indian               | Aq | Aquatic                         | Leaves                | Cooked as                                                | R     | ++   |                      |

|    |                                                  |                  |                  |    |                                  |                                          |                        |       |      |                                                                            |
|----|--------------------------------------------------|------------------|------------------|----|----------------------------------|------------------------------------------|------------------------|-------|------|----------------------------------------------------------------------------|
|    | <u>Gaertn.</u>                                   |                  | lotus            |    | bodies                           | and<br>rhizom<br>es                      | Vegetable              |       |      |                                                                            |
| 49 | <i>Olas scandens</i> Roxb.                       | Olaceae          | Dhehiani         | S  | Forests                          | Leaves                                   | Cooked as<br>vegetable | R     | +    | -                                                                          |
| 50 | <i>Oroxylum indicum</i><br>(Linn.) Benth.Ex Kurz | Bignoniaceae     | Bhut-<br>vriksha | T  | Degraded<br>forest               | Leaves<br>and<br>stems                   | Cooked as<br>vegetable | S & W | +    | -                                                                          |
| 51 | <i>Oxalis corniculata</i> Linn.                  | Oxalidaceae      | Tinpania         | Aq | Aquatic<br>bodies                | Leaves                                   | Cooked as<br>vegetable | S     | +++  | -                                                                          |
| 52 | <i>Phyllocephalum indicum</i><br>(Less) Kirkman  | Zingiberaceae    | Vanjeera         | H  | Forests                          | Young<br>leaves                          | Spice                  | R & W | +++  | -                                                                          |
| 53 | <i>Polygonum barbatum</i><br>Linn.               | Polygonaceae     | Bekhanjabaj      | H  | Forests and<br>wastelands        | Young<br>leaves                          | Cooked as<br>vegetable | R     | +++  | Medicinal                                                                  |
| 54 | <i>Portulaca oleracea</i> Linn.                  | Portulacaceae    | Golbazi          | H  | Agriculture<br>lands             | Leaves                                   | Cooked as<br>vegetable | R & W | ++++ | -                                                                          |
| 55 | <i>Portulaca quadrifida</i><br>Linn.             | Portulacaceae    | Bhuibazi         | H  | Agriculture<br>land              | Leaves<br>and<br>young<br>shoots         | Cooked as<br>vegetable | R     | +++  | Medicinal                                                                  |
| 56 | <i>Rorippa indica</i> (Linn.)<br>Hiern. Syn.     | Brassicaceae     | Chamsuru         | H  | Agriculture<br>lands             | Tender<br>shoots<br>&<br>young<br>leaves | Cooked as<br>vegetable | W     | ++   | -                                                                          |
| 57 | <i>Shorea robusta</i> Gaertn.                    | Dipterocarpaceae | Hargami          | T  | Forests                          | Seeds<br>and<br>young<br>leaves          | Cooked as<br>vegetable | S     | +    | Timber, NTFP<br>&. Medicinal                                               |
| 58 | <i>Smithia conferta</i> Sm.                      | Fabaceae         | Duthi            | H  | Forests                          | Leaves                                   | Cooked as<br>vegetable | R     | +    | Medicinal                                                                  |
| 59 | <i>Tamarindus indica</i> Linn.                   | Fabaceae         | Imli             | T  | Agriculture<br>and<br>wastelands | Young<br>leaves<br>and<br>flower<br>buds | Cooked as<br>vegetable | S     | ++   | Firewood,<br>Fruits-ripe<br>fruits eaten,<br>pulp Katta sag<br>with pulses |
| 60 | <i>Trianthema<br/>potulacstrum</i> Linn.         | Aizoaceae        | Salsa            | H  | Agriculture<br>and               | Young<br>leaves                          | Cooked as<br>vegetable | R     | ++   | -                                                                          |

|                                                                                  |                                                     |                     |                   |   |                |                              |                                            |   |   |                                   |
|----------------------------------------------------------------------------------|-----------------------------------------------------|---------------------|-------------------|---|----------------|------------------------------|--------------------------------------------|---|---|-----------------------------------|
|                                                                                  |                                                     |                     |                   |   | wastelands     |                              |                                            |   |   |                                   |
| <b>Wild flowers, fruits, seeds, nuts and pods used by indigenous communities</b> |                                                     |                     |                   |   |                |                              |                                            |   |   |                                   |
| 61                                                                               | <i>Abelmoschus crinitus</i><br>Wall                 | <u>Malvaceae</u>    | Kamlyā            | H | Flowers        | Leaves and<br>flowers        | Forest<br>Fringe<br>s                      | W | + | Medicinal                         |
| 62                                                                               | <i>Abelmoschus moschatus</i><br><u>Medik.</u>       | Malvaceae           | Jungli bhendi     | H | Fruits         | Vegetable                    | Forest                                     | W | + | Medicinal                         |
| 63                                                                               | <i>Adina cordifolia</i><br>(Roxb.) B & H            | <u>Rutaceae</u>     | Haldu, Karma      | T | Fruit          | Timber, Leaves<br>and fruits | Forests                                    | S | + | Timber,<br>Medicinal<br>uses      |
| 64                                                                               | <i>Aegle marmelos</i><br>(L.) <u>Corrêa</u>         | <u>Rutaceae</u>     | Bel               | T | Fruit          | Cold beverarae               | Wild<br>and<br>along<br>forest<br>fringe   | S | + | Medicinal,<br>Religious           |
| 65                                                                               | <i>Ampelocissus barbata</i><br>Wall.                | Vitaceae            | Van angur         | C | Berries        | Ripe berries eaten           | Forest                                     | W | + | Folk<br>medicine                  |
| 66                                                                               | <i>Annona squamosa</i> <u>L.</u>                    | Annonaceae          | Sitaphal          | S | Fruit          | Ripe fruits eaten            | Along<br>forest<br>fringes                 | W | + | Medicinal                         |
| 67                                                                               | <i>Anogeissus latifolia</i><br>(Roxb. ex DC.) Wall. | <u>Combretaceae</u> | Dhaora/<br>dhawra | T | Leaves<br>Bark | tanning and<br>firewood      | Forests                                    | S | + | Medicinal,<br>Gums                |
| 68                                                                               | <i>Anthocephalous kadamba</i>                       | Rubiaceae           | Kadam             | T | Fruits         | Ripe fruits eaten            | Forest<br>and<br>open                      | W | + | -                                 |
| 69                                                                               | <i>Artocarpus heterophylla</i><br>Lam.              | <u>Moraceae</u>     | Jackfruit         | T | Fruit          | Vegetable                    | Wild<br>lands,<br>Forests                  | S | + | Timber<br>Medicinal,<br>Religious |
| 70                                                                               | <i>Azadirachta indica</i><br><u>A.Juss.</u>         | <u>Meliaceae</u>    | Neem              | T | Fruit          | Pulp of ripe fruits<br>eaten | Wild<br>Habita<br>tion                     | R | + | M &<br>Cultural                   |
| 71                                                                               | <i>Bahunia villi</i> (L.) Benth.                    | <u>Fabaceae</u>     | Mahul             | C | seeds          | Roasted seeds are<br>eaten   | Forest,<br>Agricu<br>ltural<br>&<br>Wastel | W | + | Medicinal<br>& NTFP               |

|    |                                             |                       |              |        |                         |                                             |                               |   |   |                                    |
|----|---------------------------------------------|-----------------------|--------------|--------|-------------------------|---------------------------------------------|-------------------------------|---|---|------------------------------------|
|    |                                             |                       |              |        |                         |                                             | ands                          |   |   |                                    |
| 72 | <i>Bauhinia purpurea</i> L.                 | <u>Fabaceae</u>       | Koelar       | T      | Floral buds             | Floral buds<br>cooked as<br>vegetables      | Forest                        | S | + | Medicinal                          |
| 73 | <i>Boerhavia diffusa</i> L.                 | <u>Nyctaginaceae</u>  | Punarnava    | H      | Seeds                   | Eaten                                       | Agricultural                  | W | + | Medicinal                          |
| 74 | <i>Bombax ceiba</i> L.                      | <u>Malvaceae</u>      | Semal        | T      | Flowers                 | Cooked as<br>vegetable                      | Forest                        | S | + | Silk cotton<br>tree                |
| 75 | <i>Bridelia retusa</i><br>(L.) A.Juss       | <u>Phyllanthaceae</u> | Kaji, Kinu   | T      | Fruit, Bark,<br>Flowers | Ripe fruit pulp                             | Forest                        | W | + | Medicinal                          |
| 76 | <i>Buchanania lanjan</i><br>Spreng.         | <u>Anacardiaceae</u>  | Char         | T      | Fruits &<br>Seeds       | Ripe fruits eaten<br>& endosperm of<br>seed | Forests                       | S | + | Edible and<br>medicinal<br>uses    |
| 77 | <i>Butea monosperma</i><br>(Lam.) Taub.     | <u>Fabaceae</u>       | Parsa, Palas | T      | Flower &<br>Seed        | Flower buds eaten                           | Wild<br>lands<br>&<br>Forests | W | + | Medicinal                          |
| 78 | <i>Capparis zeylanicum</i> L.               | Capparaceae           |              | C      | Fruits                  | Cooked as<br>vegetable                      | Wild                          | S | + | Medicinal                          |
| 79 | <i>Carissa carandas</i> L.                  | <u>Apocynaceae</u>    | Karonda      | S      | Fruits                  | Ripe fruits eaten<br>& pickled              | Agricultural                  | W | + | Live fence                         |
| 80 | <i>Cassia fistula</i> L.                    | <u>Fabaceae</u>       | Amaltas      | T      | Flowers                 | Cooked                                      | Forest                        | S | + | Medicinal                          |
| 81 | <i>Celastrus paniculatum</i><br>Willd.      | <u>Celastraceae</u>   | Malkangani   | W<br>C | Flower<br>Young         | Flowers cooked as<br>Vegetable              | Forest                        | S | + | Medicinal                          |
| 82 | <i>Coccinia grandis</i> Voigt.              | Cucurbitaceae         | Van Kundru   | C      | Fruits                  | Unripe fruits as<br>vegetable               | Agricultural                  | Y | + | Perennial<br>climber,<br>medicinal |
| 83 | <i>Coccinia indica</i>                      | Cucurbitaceae         | Van Kundru   | C      | Fruits                  | Unripe fruits as<br>vegetable               | Agricultural                  | Y | + | Medicinal                          |
| 84 | <i>Cochlospermum religiosum</i> (L.) Alston | <u>Bixaceae</u>       | Kumbi        | T      | Flowers &<br>Seeds      | Flowers cooked as<br>Vegetable              | Forest                        | S | + | Medicinal                          |
| 85 | <i>Cordia dichotoma</i>                     | Boraginaceae          | Lasooda      | T      | Fruits                  | Fruits cooked as                            | Forest                        | S | + | Medicinal                          |

|    |                                          |                     |             |      |        |                                            |                               |   |   |                                    |
|----|------------------------------------------|---------------------|-------------|------|--------|--------------------------------------------|-------------------------------|---|---|------------------------------------|
|    | G.Forst.                                 |                     |             |      |        | Vegetable and pickled                      |                               |   | + |                                    |
| 86 | <i>Dillenia pentagyna</i> Roxb.          | <u>Dilleniaceae</u> | Karmal      | T    | Fruits | Immature fruits eaten and pickled          | Forest                        | S | + | Medicine for Ayurveda and Folk     |
| 87 | <i>Diospyros melanoxylon</i> Roxb.       | <u>Ebenaceae</u>    | Tendu       | T    | Fruit  | Ripe fruits eaten                          | Forests                       | S | + | Timber, NTFP, wrapping bidis       |
| 88 | <i>Feronia elephantum</i> Corr.          | <u>Rutaceae</u>     | Kaith       | T    | Fruit  | Ripe fruits eaten & pickled                | Forest                        | S | + | Edible food                        |
| 89 | <i>Ficus benghalensis</i> L.             | <u>Moraceae</u>     | Bargad      | T    | Fruit  | Ripe fruits eaten                          | Wild lands, Forests           | S | + | Religious                          |
| 90 | <i>Ficus hispida</i> L.f.                | <u>Moraceae</u>     | Kala Umbar  | T    | Fruits | Ripe fruits eaten. Unripe fruits vegetable | Wild lands                    | W | + | <b>Medicines</b>                   |
| 91 | <i>Ficus infectoria</i> (Miq.)           | <u>Moraceae</u>     | Pakar       | T    | Leaves | Cold beverage                              | Forest and wildlands          | W | + | Medicinal                          |
| 92 | <i>Ficus religiosa</i> L.                | <u>Moraceae</u>     | Pipal       | T    | Fruit  | Ripe fruits eaten                          | Wild lands, Forests           | S | + | Religious                          |
| 93 | <i>Flacourtia indica</i> (Burm.f.) Merr. | <u>Salicaceae</u>   | Alu Bukhara | T    | Fruit  | Fruit - raw or cooked                      | Forest Agricultural, and open | W | + | Sweet, Jam, Jelly, Wine, Medicinal |
| 94 | <i>Flacourtia indica</i> (Burm.f.) Merr. | <u>Salicaceae</u>   | Bilangada   | S, T | Fruits | Raw eaten or cooked                        | Forest fringes                | S | + | Herbal medicine                    |
| 95 | <i>Grewia asiatica</i> L.                | Malvaceae           | Phalsa      | T    | Fruit  | The fruit can be eaten raw,                | Forest                        | W | + | Edible, Medicinal                  |
| 96 | <i>Grewia rothii</i> DC.                 | <u>Malvaceae</u>    | Kiraman     | S    | Bark   | Medicinal                                  | Open Forest area              | S | + | Cultural, Medicinal, NTFPs         |



|     |                                       |                          |              |   |                                  |                                                   |                              |   |   |                       |
|-----|---------------------------------------|--------------------------|--------------|---|----------------------------------|---------------------------------------------------|------------------------------|---|---|-----------------------|
| 97  | <i>Indigofera pulchela</i> L.         | <u>Fabaceae</u>          | Neeli        | H | Flower                           | Vegetable                                         | Agriculture                  | S | + | Medicinal             |
| 98  | <i>Lantana camara</i> L.              | Verbenaceae              | Raimuniya    | S | Fruits                           | Ripe fruits are eaten                             | Forest & Agriculture         | S | + | Medicinal             |
| 99  | <i>Limonia crenulata</i> (Roxb.) Roem | Rutaceae                 | Beli         | S | Fruit                            | Eaten                                             | Forest                       | W | + | Medicinal             |
| 100 | <i>Madhuca indica</i> (Roxb.) A.Chev. | <u>Sapotaceae</u>        | Mahua        | T | Flower<br>Unripe<br>fruits, seed | Flowers and fruits raw eaten, beverage, seeds oil | Forests & Agricultural lands | S | + | Medicinal & Religious |
| 101 | <i>Mangifera indica</i> L.            | <u>Anacardiaceae</u>     | Am           | T | Ripe and unripe Fruit            | Ripe fruits eaten & unripe pickled                | Forest & Agricultural lands  | S | + | Rituals & Cultural    |
| 102 | <i>Meyna spinosa</i> Roxb.            | Rubiaceae                | Munya        | S | Fruit                            | Raw eaten                                         | Forest                       | W | + | Medicine              |
| 103 | <i>Mimuopsis elengi</i> L.            | <u>Sapotaceae</u>        | Maulshree    | T | Fruits                           | Ripe fruits are eaten                             | Habitation                   | S | + | Medicinal             |
| 104 | <i>Momordica charantia</i>            | Cucurbitaceae            | Van karela   | C | Unripe                           | Cooked vegetables as                              | Agriculture & Forest fringes | R | + | Medicinal             |
| 105 | <i>Momordica dioica</i> , Spreng.     | Cucurbitaceae            | Jungli keksi | C | Unripe Fruits                    | Cooked vegetables as                              | Agriculture & Forest fringes | R | + | Medicinal             |
| 106 | <i>Moringa oleifera</i>               | Moringaceae              | Munga        | T | Leaves, flowers & pods           | Cooked vegetables as                              | Agriculture & Forest fringes | R | + | Medicinal             |
| 107 | <i>Morus alba</i> L.                  | Moraceae                 | Sahtoot      | T | Fruits                           | Ripe fruits are eaten                             | Agriculture                  | W | + | Traditional medicine  |
| 108 | <i>Mucuna pruriens</i>                | Fabaceae/<br>Leguminosae | Kewanch      | C | Pods                             | Pods cooked as vegetable                          | Wild lands                   | W | + | M                     |

|     |                                           |                       |                             |   |                        |                             |                             |   |   |                                                     |
|-----|-------------------------------------------|-----------------------|-----------------------------|---|------------------------|-----------------------------|-----------------------------|---|---|-----------------------------------------------------|
|     |                                           |                       |                             |   |                        |                             | and forest fringes          |   |   |                                                     |
| 109 | <i>Passiflora foetidia</i> L              | Passifloraceae        | Jhumka lata                 | C | Fruits                 | Ripe fruits are eaten       | Agricultural lands          | W | + | M                                                   |
| 110 | <i>Phoenix sylvestris</i> (L.) Roxb.      | <u>Arecaceae</u>      | Wild kajur                  | T | Fruit                  | Ripe fruits eaten           | Agriculture                 | R | + | Medicinal (Fruit/Seed/Root), Food, Fodder, Fuelwood |
| 111 | <i>Phyllanthus emblica</i> L.             | <u>Phyllanthaceae</u> | Aonla                       | T | Fruits                 | Ripe fruits eaten & pickled | Forest & Agricultural lands | W | + | Medicinal & Rituals                                 |
| 112 | <i>Pithecolobium dulce</i> (Roxb.) Benth. | Caesalpinaceae        | Gangaimli                   | T | Fruit                  | Aril of fruits eaten        | Wild lands, Forests         | W | + | Traditional medicine                                |
| 113 | <i>Prosopis cineraria</i>                 | <u>Fabaceae</u>       | Jungli sami, Chikur, Khejri | T | Fruit                  | Leaves and fruit eaten      | Forest and Open             | S | + | Medicinal & NTFPs                                   |
| 114 | <i>Schleichera oleosa</i> , Oken          | Sapindaceae           | Kusum                       | T | Fruits                 | Ripe fruits eaten           | Forest                      | S | + | NTFP, Lac production                                |
| 115 | <i>Semecarpus anacardium</i> Linn.        | <u>Anacardiaceae</u>  | Bheluva                     | T | Fruits & seeds         | Roasted fruits are eaten    | Degraded forests            | S | + | Medicinal. Marking of clothes                       |
| 116 | <i>Sesbania grandiflora</i> (L.) Pers.    | <u>Fabaceae</u>       | Agathi                      | T | Flower & tender fruits | Vegetable                   | Agriculture                 | Y | + | Medicinal                                           |
| 117 | <i>Shorea robusta</i> Roth.               | Dipterocarpaceae      | Sarai/Sal                   | T | Seeds, Leaves          | Oil from seeds              | Forest fringes              | W | + | Biodiesel                                           |
| 118 | <i>Solanum nigrum</i> , Linn              | <u>Solanaceae</u>     | Makai                       | H | Fruits                 | Ripe fruits eaten           | Wild lands                  | W | + | Medicinal                                           |
| 119 | <i>Sterculia urens</i> Roxb.              | Sterculiaceae         | Karaya                      | T | Seeds and gum          | Seeds – roasted             | Forest                      | S | + | NTFP Gum edible thicker and                         |

|                                                                                          |                                          |                      |                  |   |                           |                                                   |                             |     |    |                         |
|------------------------------------------------------------------------------------------|------------------------------------------|----------------------|------------------|---|---------------------------|---------------------------------------------------|-----------------------------|-----|----|-------------------------|
|                                                                                          |                                          |                      |                  |   |                           |                                                   |                             |     |    | binding of foods        |
| 120                                                                                      | <i>Strychnos nuxvomica</i> L.            | <u>Loganiaceae</u>   | Kuchla           | T | Fruits                    | Eaten by children                                 | Forest                      | S   | +  | Water purifier          |
| 121                                                                                      | <i>Syzigium cumini</i> (L.) Skeels       | <u>Myrtaceae</u>     | Jamun            | T | Fruit                     | Ripe fruits eaten, syrup                          | Forests & wild lands        | S   | +  | Medicinal               |
| 122                                                                                      | <i>Tamarindus indica</i> L.              | <u>Leguminosae</u>   | Imli             | T | Flowers, fruits and seeds | Flower as vegetable, fruits eaten and seeds flour | Forest & Agricultural lands | S   | +  | Medicinal               |
| 123                                                                                      | <i>Terminalia bellerica</i> Roxb.        | <u>Combretaceae</u>  | Bahera           | T | Fruit                     | Ripe fruits eaten                                 | Forests                     | S   | +  | Medicinal & Timber      |
| 124                                                                                      | <i>Tetrastigma lanceolarium</i> Roxb.    | <u>Vitaceae</u>      | Bharseri         | C | Berries                   | Ripe berries eaten                                | Forest                      |     | +  | Edible and medicinal    |
| 125                                                                                      | <i>Trichosanthes cucumerina</i> L.       | <u>Cucurbitaceae</u> | Jungli chichoda  | C | Fruit                     | Eaten                                             | Forest and Open             | S   | +  | Medicinal               |
| 126                                                                                      | <i>Woodfordia floribunda</i> (L.). Kurz. | <u>Lytharaceae</u>   | Dhavai           | S | Flowers                   | Flowers are eaten as food                         | Forest                      | S   | +  | Medicinal               |
| 127                                                                                      | <i>Ziziphus jujuba</i> Mill.             | <u>Rhamnaceae</u>    | Ber              | T | Fruits                    | Ripe fruits are eaten                             | Wild lands, Forests         | W   | +  | Medicinal and Religious |
| 128                                                                                      | <i>Ziziphus martiana</i> Lam.            | <u>Rhamnaceae</u>    | Chota ber        | S | Fruits                    | Ripe fruits are eaten                             | Wild lands & Forests        | W   | +  | Medicinal and Religious |
| 129                                                                                      | <i>Ziziphus oenophylla</i> Lam.          | <u>Rhamnaceae</u>    | Makora           | S | Fruits                    | Eaten by children                                 | Forest                      | W   | +  | Medicinal               |
| 130                                                                                      | <i>Ziziphus xylopyrus</i> (Retz.) Willd. | <u>Rhamnaceae</u>    | Kathber, Baraber | S | Fruits                    | Eaten and used as drug                            | Forest                      | W   | +  | Medicinal               |
| Wild edible rhizomes, roots, underground stems and tubers used by indigenous communities |                                          |                      |                  |   |                           |                                                   |                             |     |    |                         |
| 131                                                                                      | <i>Amorphophallus bulbifera</i>          | <u>Araceae</u>       | Zamin            | H | Corn                      | Corn is edible                                    | Forest                      | W&S | ++ | Medicinal               |

|     |                                                  |                     |                     |   |             |                                                                   |                                   |      |          |            |
|-----|--------------------------------------------------|---------------------|---------------------|---|-------------|-------------------------------------------------------------------|-----------------------------------|------|----------|------------|
|     | (Roxb.) Bl.                                      |                     | kand                |   |             | after boiling.                                                    |                                   |      |          | l          |
| 132 | <i>Amorphophallus paeoniifolius</i> (Dennst.) N. | Araceae             | Suran kand          | H | Corn        | Corms, and stem eaten and cooked as vegetable.                    | Habitations and Agriculture lands | W&S  | +++      | Medicina l |
| 133 | <i>Asparagus racemosus</i> Willd.                | Liliaceae           | Shatavari,          | H | Tuber, root | Tubers are consumed as vegetable                                  | Forest                            | W& S | ++       | Medicina l |
| 134 | <i>Chlorophytum arundinaceum</i> (Roxb.) Baker   | <u>Asparagaceae</u> | Safed musli         | H | Suckers     | Root                                                              | Forest and agricultural land      | R    | ++       | Medicina l |
| 135 | <i>Chlorophytum tuberosum</i> (Roxb.) Baker      | <u>Asparagaceae</u> | Musli               | H | Suckers     | Root                                                              | Forest and agricultural land      | R    | ++       | Medicina l |
| 136 | <i>Colocasia esculentum</i> L.                   | Araceae             | Kochai              | H | Tuber       | Corms, petiole and leaves are cooked as vegetable.                | Agriculture lands                 | W    | +++<br>+ | -          |
| 137 | <i>Costus speciosus</i> (I.Konig) C.Specht       | Zingiberaceae       | Kewkanda            | H | Rhizomes    | Rhizomes eaten as vegetable, chutney and pickle.                  | Forest                            | W    | ++       | Medicina l |
| 138 | <i>Curculigo orchioides</i> Gaertn.              | Hypoxidaceae        | Kalimusli           | H | Tuber       | Tuberous roots eaten as vegetables                                | Forest                            | W&S  | ++       | Medicina l |
| 139 | <i>Curcuma angustifolia</i> L.                   | Zingiberaceae       | Thikur              | H | Rhizome     | Strach extracted from rhizome Rhizomes as Sarbat, Halwa and Barfi | Forest                            | W    | +++      | Medicina l |
| 140 | <i>Curcuma caesia</i> Roxb                       | Zingiberaceae       | Kalihaldi           | H | Rhizomes    | Rhizomes used as Spice and flavour ing.                           | Agriculture lands                 | W    | ++       | Medcinal   |
| 141 | <i>Cyperus esculent</i> Linn                     | Cyperaceae          | Nagar motha         | H | Tuber       | Eaten tubers                                                      | Swamps                            | R, W | ++       | Medicina l |
| 142 | <i>Dioscorea alata</i> (L.)                      | Dioscoreaceae       | Nagarkand, Uskakand | C | tuber       | Raw tubers used as vegetable                                      | Forest                            | W    | +++      | Medicine s |

|                                                      |                                             |                      |                         |           |                       |                                                                      |                      |              |                   |           |
|------------------------------------------------------|---------------------------------------------|----------------------|-------------------------|-----------|-----------------------|----------------------------------------------------------------------|----------------------|--------------|-------------------|-----------|
| 143                                                  | <i>Dioscorea bulbifera</i> (L.)             | Dioscoreaceae        | Damgkanda               | C         | tuber                 | Aerial and tubers used as vegetable and boiled form for consumption. | Forest               | W            | +++               | Medicinal |
| 144                                                  | <i>Dioscorea hispida</i> Dennst.            | Dioscoreaceae        | Kuliakanda              | C         | tuber                 | Tubers eaten as chips                                                | Forest               | W            | +++               | -         |
| 145                                                  | <i>Dioscorea pentaphylla</i> L.             | Dioscoreaceae        | Suwarkanda,             | C         | tuber                 | Tubers cooked as vegetable.                                          | Forest               | W            | +++               | Medicinal |
| 146                                                  | <i>Dioscorea pubera</i> Blume               | Dioscoreaceae        | Ban Alu                 | C         | Tuber                 | Eaten                                                                | Forest               | W            | ++                | -         |
| 147                                                  | <i>Ipomoea cairica</i> (L.) Sweet           | Convolvulaceae       | Neeli Bel               | C         | Tuber                 | Leaves cooked and eaten as a vegetable<br>Tubers & stem cooked.      | Swamps               | W            | ++                | -         |
| 148                                                  | <i>Leea macrophylla</i> (Roxb. ex Hornem) H | Leeaceae             | Dhotelakanda            | H/S       | Stems, Leaves, roots  | Roots cooked as vegetable                                            | Forest               | R            | +++               | Medicinal |
| 149                                                  | <i>Nelumbium nucifera</i> Gaerth            | <u>Nelumbonaceae</u> | Kamal                   | H         | Rhizomes, stem, tuber | Root cooked as a vegetable                                           | Wetlands             | R, W         | +++<br>+          | -         |
| 150                                                  | <i>Pueraria tuberosa</i> (Roxb. ex Willd) C | Fabaceae             | Patal kumda Bidari kand | H         | Tuber                 | Tubers root cooked as vegetable.                                     | Forest               | R            | +++               | Medicinal |
| 151                                                  | <i>Scirpus grossus</i> (L.f.) e G           | Cyperaceae           | Kaseru Kand             | H         | Tubers                | Tubers consumed as vegetable                                         | Wetlands             | W            | +                 | -         |
| 152                                                  | <i>Trapa nutans</i> L.                      | <u>Lythraceae</u>    | Singhada                | H         | Tubers                | Seeds are raw and boiled eaten                                       | Wet lands            | W            | +++<br>+          | -         |
| 153                                                  | <i>Urginea indica</i> (Roxb.) Kunth         | Liliaceae            | Jangli-piyaz            | H         | Bulb                  | Bulbs cooked as vegetable                                            | Forest               | W            | ++                | Medicinal |
| Wild edible mushrooms used by indigenous communities |                                             |                      |                         |           |                       |                                                                      |                      |              |                   |           |
| S. No.                                               | Botanical name                              | Family               | Local name              | Part used | Mode of utilization   | Habitat                                                              | Season of collection | Edible value | Diversity of uses |           |

|     |                                                            |                                 |                 |               |                                            |                                               | n            | ue       |                   |
|-----|------------------------------------------------------------|---------------------------------|-----------------|---------------|--------------------------------------------|-----------------------------------------------|--------------|----------|-------------------|
| 154 | <i>Agaricus compestris</i> L.                              | <u>Agaricaceae</u>              | Butter mushroom | Fruiting body | Cooking as Vegetable, Used as flore        | Agriculture, degraded & wild lands            | June-August  | +++<br>+ | Edible            |
| 155 | <i>Astraeus asiaticus</i> Phosri, Martin & Watling         | <u>Diplocystaceae</u>           | Puttu           | Fruiting body | Vegetable, pickle, papad & medicine        | Forests, Wasteland, degraded lands            | June-August  | +++<br>+ | Edible, Medicinal |
| 156 | <i>Astraeus hygrometricus</i> (Pers.) Morgan               | <u>Diplocystaceae</u>           | Puttu, Rugra    | Fruiting body | Vegetable, pickle, papad & medicine        | Wasteland, wild lands, degraded               | June-August  | +++      | Edible, Medicinal |
| 157 | <i>Astraeus koreanus</i> (Pers.) Morgan                    | <u>Diplocystaceae</u>           | Puttu           | Fruiting body | Vegetable, pickle, papad & medicine        | Forests, Wasteland, wild lands, degraded land | June-August  | +++      | Edible, Medicinal |
| 158 | <i>Astraeus morganii</i> (Pers.) Morgan                    | <u>Diplocystaceae</u>           | Puttu           | Fruiting body | Vegetable, pickle, papad & medicine        | Wasteland, Forests, degraded land             | June-August  | +++      | Edible, Medicinal |
| 159 | <i>Astraeus odoratus</i> Phosri, Watling, Martin & Whalley | <u>Diplocystaceae</u>           | Puttu           | Fruiting body | Vegetable, pickle, papad & medicine        | Wasteland, wild lands, degraded               | June-August  | +++      | Edible, Medicinal |
| 160 | <i>Astraeus smithii</i> Watling, Martin & Phosri           | <u>Diplocystaceae</u>           | Puttu           | Fruiting body | Vegetable, pickle, papad & medicine        | Wasteland, wild lands, degraded               | June-August  | +++      | Edible, Medicinal |
| 161 | <i>Ganoderma lucidum</i> (Curtis) Karst                    | Polyporaceae Or Ganodermataceae | Reishi mushroom | Fruiting body | Medicine                                   | Dense Sal Forest, Wild land, Forests          | July-October | +++      | Medicinal         |
| 162 | <i>Lepiota procera</i> (Scop. ex Fr.) Kumm.                | Paxilliacaeae                   | Parasol         | Caps          | Vegetable                                  | Forest fringes, Agriculture                   | July-August  | +++      | Edible, Medicinal |
| 163 | <i>Macrolepiota dolichaula</i> Singer                      | <u>Agaricaceae</u>              | Parasol         | Caps and stem | Cooking as vegetable                       | Forest fringes, Agriculture                   | July-August  | +++      | Edible, Medicinal |
| 164 | <i>Pleurotus flabellatus</i> Berk. & Br                    | Tricholomataceae                | Oyster          | Fruiting body | Vegetable, pickle, papad, flore & medicine | Forest fringes, Agriculture, open areas,      | July-August  | +++<br>+ | Edible, Medicinal |
| 165 | <i>Russula congoana</i> Pat.                               | Russulaceae                     | Sarai Pihri     | Fruiting body | Medicine & Cooking                         | Dense Sal forest, Forest fringes              | June-August  | ++       | Medicinal         |

|     |                                                  |                      |                   |               |                                     |                                           |               |          |                   |
|-----|--------------------------------------------------|----------------------|-------------------|---------------|-------------------------------------|-------------------------------------------|---------------|----------|-------------------|
| 166 | <i>Russula solaris</i> Ferd. & Winge             | Russulaceae          | Sarai Pihri       | Fruiting body | Cooking                             | Forest fringes, Open land                 | June - August | ++       | Edible, Medicinal |
| 167 | <i>Scleroderma bovista</i> Fr.                   | <u>Agaricaceae</u>   | Potato Pihri      | Fruiting body | Vegetable                           | Forests, degraded & wild lands, grassland | July-August   | +++      | Edible, Medicinal |
| 168 | <i>Termitomyces clypeatus</i> R. Heim            | <u>Lyophyllaceae</u> | Pihri-Chirko      | Fruiting body | Vegetable & pickle                  | Forest fringes, forest villages           | July - August | +++<br>+ | Edible, Medicinal |
| 169 | <i>Termitomyces heimii</i> Natarajan             | <u>Lyophyllaceae</u> | Sarai Pihri       | Fruiting body | Medicine & cooking                  | Dense Sal forest, Forest fringes          | July - August | ++       | Medicinal         |
| 170 | <i>Termitomyces eurhizus</i> (Berk.) R. Heim     | <u>Lyophyllaceae</u> | Pihri - Bhondo    | Fruiting body | Vegetable & pickle                  | Forest fringes, forest villages           | July - August | +++<br>+ | Edible, Medicinal |
| 171 | <i>Termitomyces microcarpus</i> (Berk. & Broome) | <u>Lyophyllaceae</u> | Pihri -Bhat       | Fruiting body | Vegetable & pickle                  | Forest fringes, forest villages           | July - August | +++<br>+ | Edible, Medicinal |
| 172 | <i>Termitomyces sp</i> R. Heim                   | <u>Lyophyllaceae</u> | Pihri- Raj Bhondo | Fruiting body | Vegetable, pickle, papad & medicine | Forest fringes, forest villages           | July - August | +++<br>+ | Edible, Medicinal |

Where; T- Tree, S- Shrub, H-Herb, Aq- Aquatic, Cl-climber, R-Rainy, W-Winter, S- Summer, Y-throughout the year, +++-Very high, +++-High, ++ - Moderate, +- Least, NTFP-Non timber forest product

**Table S2:** Price list of important WEPs sold in *hat* (weekly) markets of AABR, Central India

| S. No. | Botanical name                                | Family          | Local name | Unit   | Price (Rs.) |
|--------|-----------------------------------------------|-----------------|------------|--------|-------------|
| 1      | <i>Aegle marmelos</i> (L.) Corrêa (F & D)     | Rutaceae        | Bel        | 1 kg   | 15-20       |
| 2      | <i>Annona squamosa</i> L. (F)                 | Annonaceae      | Sitaphal   | 12 nos | 40-60       |
| 3      | <i>Madhuca indica</i> (Roxb.) A.Chev. (D)     | Sapotaceae      | Mahua      | 1 kg   | 30-40       |
| 4      | <i>Diospyros melanoxylon</i> Roxb. (F)        | Ebenaceae       | Tendu      | 1 kg   | 20-25       |
| 5      | <i>Syzgium cumini</i> (L.) Skeels (F)         | Myrtaceae       | Jamun      | 1 kg   | 30-40       |
| 6      | <i>Feronia elephantum</i> Corr. (F)           | Rutaceae        | Kaith      | 1 kg   | 25-30       |
| 7      | <i>Mangifera indica</i> L. (F)                | Anacardiaceae   | Am         | 1 kg   | 30-80       |
| 8      | <i>Phyllanthus emblica</i> L. (F & D)         | Phyllanthaceae  | Aonla      | 1 kg   | 40-60       |
| 9      | <i>Tamarindus indica</i> L. (D)               | Leguminosae     | Imli       | 1 kg   | 25-40       |
| 10     | <i>Buchanania lanjan</i> Spreng. (F & D)      | Anacardiaceae   | Char       | 1 kg   | 150-200     |
| 11     | <i>Zizyphus jujuba</i> Mill. (F & D)          | Rhamnaceae      | Ber        | 1 kg   | 30-40       |
| 12     | <i>Pithecolobium dulce</i> (Roxb.) Benth. (F) | Caesal pinaceae | Gangaimli  | 1 kg   | 25-30       |
| 13     | <i>Artocarpus heterophylla</i> Lam. (F)       | Moraceae        | Jackfruit  | 1 kg   | 10-15       |
| 14     | <i>Carissa carandas</i> L. (F)                | Apocynaceae     | Karonda    | 1 kg   | 20-25       |
| 15     | <i>Terminalia bellerica</i> Roxb. (D)         | Combretaceae    | Bahera     | 1 kg   | 25-30       |
| 16     | <i>Bauhinia purpurea</i> L. (F)               | Fabaceae        | Koelar     | 1 kg   | 20-25       |
| 17     | <i>Coccinia grandis</i> Voigt. (F)            | Cucurbitaceae   | Van Kundru | 1 kg   | 10-20       |



|    |                                              |                  |                |      |        |
|----|----------------------------------------------|------------------|----------------|------|--------|
| 18 | <i>Coccinia indica</i> (F)                   | Cucurbitaceae    | Van Kundru     | 1 kg | 50-70  |
| 19 | <i>Momordica dioica</i> , Spreng. (F)        | Cucurbitaceae    | Jungli keksi   | 1 kg | 15-25  |
| 20 | <i>Momordica charantia</i> (F)               | Cucurbitaceae    | Van karela     | 1 kg | 15-20  |
| 21 | <i>Moringa oleifera</i> (F)                  | Moringaceae      | Munga          | 1 kg | 20-30  |
| 22 | <i>Shorea robusta</i> Roth. (D)              | Dipterocarpaceae | Sarai/Sal      | 1 kg | 20-30  |
| 23 | <i>Cordia dichotoma</i> G.Forst. (F)         | Boraginaceae     | Lasooda        | 1 kg | 80-100 |
| 24 | <i>Woodfordia floribunda</i> (L.). Kurz. (D) | Lytharaceae      | Dhavai         | 1 kg | 25-30  |
| 25 | <i>Sterculia urens</i> Roxb. (D)             | Sterculiaceae    | Karaya         | 1 kg | 40-70  |
| 26 | <i>Strychnos nuxvomica</i> L. (D)            | Loganiaceae      | Kuchla         | 1 kg | 20-30  |
| 27 | <i>Achyranthes aspera</i> Linn. (F)          | Amaranthaceae    | Chirchitta,    | 1 kg | 10-20  |
| 28 | <i>Amaranthus caudatus</i> Linn. (F)         | Amaranthaceae    | Rajgirbhaji    | 1 kg | 10-20  |
| 29 | <i>Amaranthus hybridus</i> Linn. (F)         | Amaranthaceae    | Lalbhaji       | 1 kg | 10-20  |
| 30 | <i>Amaranthus spinosus</i> Linn. (F)         | Amaranthaceae    | Kanta Cholai,  | 1 kg | 10-20  |
| 31 | <i>Amaranthus viridis</i> Linn. (F)          | Amaranthaceae    | PurpuriBhaji/  | 1 kg | 10-20  |
| 32 | <i>Bambusa bambos</i> Linn. (F)              | Poaceae          | Bans Kareel    | 1 kg | 20-30  |
| 33 | <i>Bambusa vulgaris</i> Schrad. (F)          | Poaceae          | Bans Kareel    | 1 kg | 20-30  |
| 34 | <i>Basella alba</i> Linn. (F)                | Basellaceae      | Ban Poi        | 1 kg | 20-25  |
| 35 | <i>Bauhinia purpurea</i> Linn. (F)           | Fabaceae         | Koelar-Kachnar | 1 kg | 10-15  |
| 36 | <i>Cassia tora</i> Linn. (F)                 | Fabaceae         | Charota        | 1 kg | 10-15  |

|    |                                                   |                |                      |      |       |
|----|---------------------------------------------------|----------------|----------------------|------|-------|
| 37 | <i>Chlorophytum tuberosum</i> (Roxb.) Bak. (F)    | Asparagaceae   | Safed Musli          | 1 kg | 20-35 |
| 38 | <i>Colocasia esculenta</i> Linn. (F)              | Araceae        | Jungle<br>Arbi/ghuia | 1 kg | 60-70 |
| 39 | <i>Cordia myxa</i> Forst. (F)                     | Boraginaceae   | Bohar                | 1 kg | 20-30 |
| 40 | <i>Dendrocalamus strictus</i> (Roxb.) Nees (F)    | Poaceae        | Lathi bans           | 1 kg | 25-35 |
| 41 | <i>Ipomea aquatica</i> Forsk. (F)                 | Convolvulaceae | Karmatta             | 1 kg | 10-20 |
| 42 | <i>Marsilea minuta</i> Linn. (F)                  | Marsileaceae   | Sunsiniya            | 1 kg | 10-15 |
| 43 | <i>Merremia emarginata</i> (Burm. F) Hallier. (F) | Convolvulaceae | Muskani Baji         | 1 kg | 10-15 |
| 44 | <i>Nelumbo nucifera</i> Gaertn. (F)               | Nelumbonaceae  | Indian lotus         | 1 kg | 25-30 |
| 45 | <i>Portulaca oleracea</i> Linn. (F)               | Portulacaceae  | Golbazi              | 1 kg | 15-20 |
| 46 | <i>Mentha arvensis</i> (F)                        | Lamiaceae      | Pudina               | 1 kg | 15-20 |
| 47 | <i>Hibiscus sabdariffa</i> L. (F)                 | Malvaceae      | Amari baji           | 1 kg | 10-15 |
| 48 | <i>Amorphophallus paeoniifolius</i> (Dennst.) (F) | Araceae        | Suran kand           | 1 kg | 20-30 |
| 49 | <i>Amorphophallus bulbifera</i> (Roxb.) Bl. (F)   | Araceae        | Zamin kand           | 1 kg | 15-20 |
| 50 | <i>Asparagus racemosus</i> Willd. (F)             | Liliaceae      | Shatavari,           | 1 kg | 20-30 |
| 51 | <i>Curcuma angustifolia</i> L. (F&D)              | Zingiberaceae  | Thikur               | 1 kg | 30-45 |
| 52 | <i>Colocasia esculentum</i> L. (F)                | Araceae        | Kochai               | 1 kg | 20-30 |
| 53 | <i>Dioscorea bulbifera</i> (L.) (F)               | Dioscoreaceae  | Damgkanda            | 1 kg | 15-25 |
| 54 | <i>Dioscorea pentaphylla</i> L. (F)               | Dioscoreaceae  | Suwarkanda,          | 1 kg | 15-25 |
| 55 | <i>Dioscorea alata</i> (L.) (F)                   | Dioscoreaceae  | Nagarkand,           | 1 kg | 15-25 |

|    |                                                      |                  |                    |      |         |
|----|------------------------------------------------------|------------------|--------------------|------|---------|
| 56 | <i>Dioscorea hispida</i> Dennst. (F)                 | Dioscoreaceae    | Kuliakand          | 1 kg | 15-25   |
| 57 | <i>Dioscorea pubera</i> Blume (F)                    | Dioscoreaceae    | Ban Alu            | 1 kg | 15-25   |
| 58 | <i>Nelumbium nucifera</i> Gaerth                     | Nelumbonaceae    | Kamal              | 1 kg | 25-35   |
| 59 | <i>Chlorophytum arundinaceum</i> (Roxb.) (F&D)       | Asparagaceae     | Safed musli        | 1 kg | 35-40   |
| 60 | <i>Chlorophytum tuberosum</i> (Roxb.) Baker (F)      | Asparagaceae     | Musli              | 1 kg | 40-50   |
| 61 | <i>Trapa nutans</i> L. (F)                           | Lythraceae       | Singhada           | 1 kg | 120-150 |
| 62 | <i>Termitomyces</i> sp R. Heim (D&F)                 | Lyophyllaceae    | Raj Bhondo         | 1 kg | 100-120 |
| 63 | <i>Termitomyces microcarpus</i> (Berk. Broome) (F&D) | Lyophyllaceae    | Pihri –Bhat        | 1 kg | 100-110 |
| 64 | <i>Termitomyces eurhizus</i> (Berk.) R. Heim (D&F)   | Lyophyllaceae    | Pihri –<br>Bhondo  | 1 kg | 80-100  |
| 65 | <i>Termitomyces clypeatus</i> R. Heim(D&F)           | Lyophyllaceae    | Pihri- Chirko      | 1 kg | 70-90   |
| 66 | <i>Astraeus asiaticus</i> Phosri, (D&F)              | Diplocystaceae   | Puttu              | 1 kg | 100-130 |
| 67 | <i>Agaricus compestris</i> L. (D&F)                  | Agaricaceae      | Butter<br>mushroom | 1 kg | 90-120  |
| 68 | <i>Pleurotus flabellatus</i> Berk. & Br(D&F)         | Tricholomataceae | Oyester            | 1 kg | 100-125 |
| 69 | <i>Anogissus latifolia</i> (Roxb. ex DC.) Wall. (D)  | Lythraceae       | Dhaura             | 1 kg | 40-80   |
| 70 | <i>Murraya koenigii</i> (Linn.) Sprengal (F & D)     | Rutaceae         | Mitineem           | 1 kg | 30-50   |
| 71 | <i>Abelmoschus moschatus</i> Medik. (D)              | Malvaceae        | Katuri<br>Bhendi   | 1 kg | 30-40   |
| 72 | <i>Oxalis corniculata</i> Linn. (F)                  | Oxalidaceae      | Tinpatiya          | 1 kg | 15-25   |

Note: INR Rs. 73 = 1 US Doller; D for Dry component and F for Fresh.
